# Supplementary material for: Descriptions of Three New Species of the Genus Acerataspis Uchida, 1934 (Hymenoptera, Ichneumonidae, Metopiinae), with an Illustrated Identification Key to Extant Species
Source: MDPI journal article supplement (doi:10.3390/insects14040389), 2023-04-17
Supplement: s1 [file s1]

# **Revision of the World Species of the Genus *Acerataspis* (Hymenoptera, Ichneumonidae, Metopiinae)**

Jing-Xian Liu <sup>1</sup>, Alexey Reshchikov <sup>2</sup> and Hua-Yan Chen <sup>3,\*</sup>

1. Department of Entomology, South China Agricultural University, Guangzhou 510642, China

2. Institute of Eastern Himalaya Biodiversity Research, Dali University, Dali 671003, China

3 Key Laboratory of Plant Resources Conservation and Sustainable Utilization, South China Botanical Garden, Chinese Academy of Sciences, Guangzhou 510650, China

\* Correspondence: huayanc@scbg.ac.cn

Supplements

Table S1. Interspecific pairwise distance of *Acerataspis* based on *COI* sequences (%)

|   | species                            | 1 | 2       | 3         | 4         | 5         | 6 <sup>0</sup> |
|---|------------------------------------|---|---------|-----------|-----------|-----------|----------------|
| 1 | <i>Acerataspis clavata</i>         |   | 13.2–15 | 11.4–12.8 | 12.9–13.4 | 9.8–10.7  | 12.1–13.3      |
| 2 | <i>Acerataspis fukienensis</i>     |   |         | 13.6–14.1 | 14.2–14.6 | 14.6–15.7 | 16.4–16.5      |
| 3 | <i>Acerataspis fusiformis</i>      |   |         |           | 13.9–14.4 | 11.1–12.4 | 9.7–10.4       |
| 4 | <i>Acerataspis maliae</i> sp. n.   |   |         |           |           | 12.3–12.7 | 15–15.3        |
| 5 | <i>Acerataspis separata</i> sp. n. |   |         |           |           |           | 12.7–13        |
| 6 | <i>Acerataspis similis</i> sp. n.  |   |         |           |           |           |                |
